# Supplementary material
Source: PubMed Central journal article supplement (PMC5740973)
Supplement: 31.1.e00024-17_zcm001182612s1.pdf [file 31.1.e00024-17_zcm001182612s1.pdf]

Supplementary Table 1. Major studies evaluating the performance of FDA approved/cleared multiplex molecular panels for testing positive blood culture bottles

| Study                                                             | Ward et al. (1)                                                                                                                                                    |                 |                      |                 | Bhatti et al. (2)                                                                                                                                                                             |                   |                    |                                                                 |                          |                    | Salimnia et al. (3)                                                                                                                                                                                                                                                                             |                    | Altun et al. (4)     |       |                                                                                                                                                                   |                 | Wojewoda et al. (5)                                              |                 |                                                                                                                              | Mestas et al. (6)                         |                             |                                                                                                                                                        |                 | Sullivan et al. (7)                                                   |                | Ledeboer et al. (8)                                                                                                                                     |                   |  |  |  |  |
|-------------------------------------------------------------------|--------------------------------------------------------------------------------------------------------------------------------------------------------------------|-----------------|----------------------|-----------------|-----------------------------------------------------------------------------------------------------------------------------------------------------------------------------------------------|-------------------|--------------------|-----------------------------------------------------------------|--------------------------|--------------------|-------------------------------------------------------------------------------------------------------------------------------------------------------------------------------------------------------------------------------------------------------------------------------------------------|--------------------|----------------------|-------|-------------------------------------------------------------------------------------------------------------------------------------------------------------------|-----------------|------------------------------------------------------------------|-----------------|------------------------------------------------------------------------------------------------------------------------------|-------------------------------------------|-----------------------------|--------------------------------------------------------------------------------------------------------------------------------------------------------|-----------------|-----------------------------------------------------------------------|----------------|---------------------------------------------------------------------------------------------------------------------------------------------------------|-------------------|--|--|--|--|
|                                                                   | Verigene Gram-Positive and Gram-Negative Blood Culture Test                                                                                                        |                 | FilmArray BCID panel |                 | FilmArray BCID panel                                                                                                                                                                          |                   |                    | Verigene Gram-Positive and Gram-Negative Blood Culture Test RUO |                          |                    | FilmArray BCID panel                                                                                                                                                                                                                                                                            |                    | FilmArray BCID panel |       | FilmArray BCID panel                                                                                                                                              |                 | Verigene Gram-Positive Blood Culture Test                        |                 |                                                                                                                              | Verigene Gram-Positive Blood Culture Test |                             |                                                                                                                                                        |                 | Verigene Gram-Negative Blood Culture Test                             |                | Verigene Gram-Negative Blood Culture Test                                                                                                               |                   |  |  |  |  |
|                                                                   | Sensitivity (%)                                                                                                                                                    | Specificity (%) | Sensitivity (%)      | Specificity (%) | Correctly Identified (%)                                                                                                                                                                      | Misidentified (%) | Not Identified (%) | Misidentified (%)                                               | Correctly Identified (%) | Not Identified (%) | Sensitivity (%)                                                                                                                                                                                                                                                                                 | Specificity (%)    | TP/FP                | TN/FN | Sensitivity (%)                                                                                                                                                   | Specificity (%) | Number (actual/expected) of blood cultures with Verigene results | Sensitivity (%) | Specificity (%)                                                                                                              | Number tested                             | Number correctly identified | Sensitivity (%)                                                                                                                                        | Specificity (%) | Number of isolates correctly identified/number of isolates tested (%) | PPA (%)        | NPA (%)                                                                                                                                                 |                   |  |  |  |  |
| <i>Staphylococcus</i> species                                     | 23/24 (95.8)                                                                                                                                                       | 149/149 (100)   | 69/69 (100)          | 104/104 (100)   | 64 (100)                                                                                                                                                                                      |                   |                    |                                                                 | 64 (100)                 |                    | 770/798 (96.5)                                                                                                                                                                                                                                                                                  | 1,397/1,409 (99.1) |                      |       |                                                                                                                                                                   |                 | 25/25                                                            | 100             | 100                                                                                                                          |                                           |                             |                                                                                                                                                        |                 |                                                                       |                |                                                                                                                                                         |                   |  |  |  |  |
| <i>Staphylococcus aureus</i>                                      | 17/17 (100)                                                                                                                                                        | 156/156 (100)   | 17/17 (100)          | 156/156 (100)   | 32 (100)                                                                                                                                                                                      |                   |                    |                                                                 | 32 (100)                 |                    | 253/257 (98.4)                                                                                                                                                                                                                                                                                  | 1,946/1,950 (99.8) | 22/0                 | 178/0 | 100                                                                                                                                                               | 100             | 44/44                                                            | 100             | 100                                                                                                                          | 36                                        | 36                          | 100                                                                                                                                                    | 100             |                                                                       |                |                                                                                                                                                         |                   |  |  |  |  |
| <i>Staphylococcus epidermidis</i>                                 | 44/44 (100)                                                                                                                                                        | 128/129 (99.2)  |                      |                 |                                                                                                                                                                                               |                   |                    |                                                                 | 23 (100)                 |                    |                                                                                                                                                                                                                                                                                                 |                    |                      |       |                                                                                                                                                                   |                 | 25/25                                                            | 100             | 100                                                                                                                          | 65                                        | 64                          | 100                                                                                                                                                    | 99.4            |                                                                       |                |                                                                                                                                                         |                   |  |  |  |  |
| <i>Staphylococcus lugdunensis</i>                                 |                                                                                                                                                                    |                 |                      |                 |                                                                                                                                                                                               |                   |                    |                                                                 | 1 (100)                  |                    |                                                                                                                                                                                                                                                                                                 |                    |                      |       |                                                                                                                                                                   |                 | 1/1                                                              | 100             | 100                                                                                                                          | 1                                         | 1                           | 100                                                                                                                                                    | 100             |                                                                       |                |                                                                                                                                                         |                   |  |  |  |  |
| <i>Streptococcus</i> species                                      | 8/11 (72.7)                                                                                                                                                        | 162/162 (100)   | 11/11 (100)          | 159/162 (98.1)  | 9 (100)                                                                                                                                                                                       |                   |                    |                                                                 | 9 (100)                  |                    | 198/203 (97.5)                                                                                                                                                                                                                                                                                  | 1,999/2,004 (99.8) |                      |       |                                                                                                                                                                   |                 | 13/17                                                            | 76.5            | 100                                                                                                                          |                                           |                             |                                                                                                                                                        |                 |                                                                       |                |                                                                                                                                                         |                   |  |  |  |  |
| <i>Streptococcus agalactiae</i>                                   | 3/3(100)                                                                                                                                                           | 169/170(99.4)   | 3/3(100)             | 169/170 (99.4)  | 2 (100)                                                                                                                                                                                       |                   |                    |                                                                 | 2 (100)                  |                    | 36/36 (100)                                                                                                                                                                                                                                                                                     | 2,171/2,171 (100)  | 5/0                  | 195/0 | 100                                                                                                                                                               | 100             | 6/6                                                              | 100             | 100                                                                                                                          | 6                                         | 6                           | 100                                                                                                                                                    | 100             |                                                                       |                |                                                                                                                                                         |                   |  |  |  |  |
| <i>Streptococcus pyogenes</i>                                     |                                                                                                                                                                    |                 |                      |                 | 1 (100)                                                                                                                                                                                       |                   |                    |                                                                 | 1 (100)                  |                    | 38/38 (100)                                                                                                                                                                                                                                                                                     | 2,168/2,169 (99.9) | 3/0                  | 197/0 | 100                                                                                                                                                               | 100             | 1/1                                                              | 100             | 100                                                                                                                          | 6                                         | 5                           | 83.3                                                                                                                                                   | 100             |                                                                       |                |                                                                                                                                                         |                   |  |  |  |  |
| <i>Streptococcus pneumoniae</i>                                   | 1/1 (100)                                                                                                                                                          | 170/172 (98.8)  | 1/1 (100)            | 172/172 (100)   |                                                                                                                                                                                               |                   |                    |                                                                 |                          |                    | 36/37 (97.3)                                                                                                                                                                                                                                                                                    | 2,168/2,170 (99.9) | 14/0                 | 186/0 | 100                                                                                                                                                               | 100             | 5/2                                                              | 100             | 98.2                                                                                                                         | 5                                         | 5                           | 100                                                                                                                                                    | 100             |                                                                       |                |                                                                                                                                                         |                   |  |  |  |  |
| <i>Streptococcus anginosus</i> group                              |                                                                                                                                                                    |                 |                      |                 |                                                                                                                                                                                               |                   |                    |                                                                 | 1 (100)                  |                    |                                                                                                                                                                                                                                                                                                 |                    |                      |       |                                                                                                                                                                   |                 | 4/4                                                              | 100             | 100                                                                                                                          |                                           |                             |                                                                                                                                                        |                 |                                                                       |                |                                                                                                                                                         |                   |  |  |  |  |
| <i>Enterococcus</i> species                                       |                                                                                                                                                                    |                 | 8/8 (100)            | 165/165 (100)   | 9 (100)                                                                                                                                                                                       |                   |                    |                                                                 |                          |                    | 127/130 (97.7)                                                                                                                                                                                                                                                                                  | 2,073/2,077 (99.8) | 16/5                 | 177/2 | 88.9                                                                                                                                                              | 97.3            |                                                                  |                 |                                                                                                                              |                                           |                             |                                                                                                                                                        |                 |                                                                       |                |                                                                                                                                                         |                   |  |  |  |  |
| <i>Enterococcus faecalis</i>                                      | 1/2 (50)                                                                                                                                                           | 171/171 (100)   |                      |                 |                                                                                                                                                                                               |                   |                    |                                                                 | 5 (100)                  |                    |                                                                                                                                                                                                                                                                                                 |                    |                      |       |                                                                                                                                                                   |                 | 13/13                                                            | 100             | 100                                                                                                                          | 13                                        | 12                          | 92.3                                                                                                                                                   | 100             |                                                                       |                |                                                                                                                                                         |                   |  |  |  |  |
| <i>Enterococcus faecium</i>                                       | 5/5 (100)                                                                                                                                                          | 167/168 (99.4)  |                      |                 |                                                                                                                                                                                               |                   |                    |                                                                 | 4 (100)                  |                    |                                                                                                                                                                                                                                                                                                 |                    |                      |       |                                                                                                                                                                   |                 | 27/29                                                            | 93.1            | 100                                                                                                                          | 15                                        | 15                          | 100                                                                                                                                                    | 100             |                                                                       |                |                                                                                                                                                         |                   |  |  |  |  |
| <i>Listeria</i> species                                           |                                                                                                                                                                    |                 |                      |                 |                                                                                                                                                                                               |                   |                    |                                                                 |                          |                    |                                                                                                                                                                                                                                                                                                 |                    |                      |       |                                                                                                                                                                   |                 |                                                                  |                 |                                                                                                                              |                                           |                             |                                                                                                                                                        |                 |                                                                       |                |                                                                                                                                                         |                   |  |  |  |  |
| <i>Listeria monocytogenes</i>                                     |                                                                                                                                                                    |                 |                      |                 |                                                                                                                                                                                               |                   |                    |                                                                 |                          |                    | 36/36 (100)                                                                                                                                                                                                                                                                                     | 2,171/2,171 (100)  | 2/0                  | 198/0 | 100                                                                                                                                                               | 100             |                                                                  |                 |                                                                                                                              |                                           |                             |                                                                                                                                                        |                 |                                                                       |                |                                                                                                                                                         |                   |  |  |  |  |
| <i>Klebsiella oxytoca</i>                                         | 2/2 (100)                                                                                                                                                          | 171/171 (100)   | 1/2 (50)             | 171/171 (100)   | 1 (100)                                                                                                                                                                                       |                   |                    |                                                                 | 1 (100)                  |                    | 59/64 (92.2)                                                                                                                                                                                                                                                                                    | 2,142/2,143 (99.9) | 3/0                  | 197/0 | 100                                                                                                                                                               | 100             |                                                                  |                 |                                                                                                                              |                                           |                             |                                                                                                                                                        |                 | 2/3 (67%)                                                             | 63/66 (95.5)   | 1,726/1733 (99.6)                                                                                                                                       |                   |  |  |  |  |
| <i>Klebsiella pneumoniae</i>                                      | 4/4 (100)                                                                                                                                                          | 169/169 (100)   | 4/4 (100)            | 168/169 (99.4)  | 6 (100)                                                                                                                                                                                       |                   |                    |                                                                 | 6 (100)                  |                    | 102/105 (97.1)                                                                                                                                                                                                                                                                                  | 2,093/2,102 (99.6) | 9/0                  | 191/0 | 100                                                                                                                                                               | 100             |                                                                  |                 |                                                                                                                              |                                           |                             |                                                                                                                                                        |                 | 10/10 (100%)                                                          | 339/365 (92.9) | 1,433/1434 (99.9)                                                                                                                                       |                   |  |  |  |  |
| <i>Serratia marcescens</i>                                        |                                                                                                                                                                    |                 |                      |                 | 2 (100)                                                                                                                                                                                       |                   |                    |                                                                 | 1 (50)                   | 1 (50)             | 76/77 (98.7)                                                                                                                                                                                                                                                                                    | 2,129/2,130 (99.9) |                      |       |                                                                                                                                                                   |                 |                                                                  |                 |                                                                                                                              |                                           |                             |                                                                                                                                                        |                 | 6/6 (100%)                                                            |                |                                                                                                                                                         |                   |  |  |  |  |
| <i>Proteus</i> species                                            |                                                                                                                                                                    |                 |                      |                 |                                                                                                                                                                                               |                   |                    |                                                                 |                          |                    | 39/39 (100)                                                                                                                                                                                                                                                                                     | 2,168/2,168 (100)  |                      |       |                                                                                                                                                                   |                 |                                                                  |                 |                                                                                                                              |                                           |                             |                                                                                                                                                        |                 |                                                                       | 0/1 (0%)       | 75/75 (100)                                                                                                                                             | 1,722/1724 (99.9) |  |  |  |  |
| <i>Acinetobacter</i> species                                      | 1/2 (50)                                                                                                                                                           | 171/171 (100)   |                      |                 |                                                                                                                                                                                               |                   |                    |                                                                 |                          |                    |                                                                                                                                                                                                                                                                                                 |                    |                      |       |                                                                                                                                                                   |                 |                                                                  |                 |                                                                                                                              |                                           |                             |                                                                                                                                                        |                 |                                                                       | 4/4 (100%)     | 60/61 (98.4)                                                                                                                                            | 1,736/1738 (99.9) |  |  |  |  |
| <i>Acinetobacter baumannii</i>                                    |                                                                                                                                                                    |                 |                      |                 |                                                                                                                                                                                               |                   |                    |                                                                 |                          |                    | 51/51 (100)                                                                                                                                                                                                                                                                                     | 2,151/2,156 (99.8) |                      |       |                                                                                                                                                                   |                 |                                                                  |                 |                                                                                                                              |                                           |                             |                                                                                                                                                        |                 |                                                                       |                |                                                                                                                                                         |                   |  |  |  |  |
| <i>Haemophilus influenzae</i>                                     |                                                                                                                                                                    |                 |                      |                 |                                                                                                                                                                                               |                   |                    |                                                                 |                          |                    | 43/43 (100)                                                                                                                                                                                                                                                                                     | 2,164/2,164 (100)  | 2/0                  | 198/0 | 100                                                                                                                                                               | 100             |                                                                  |                 |                                                                                                                              |                                           |                             |                                                                                                                                                        |                 |                                                                       |                |                                                                                                                                                         |                   |  |  |  |  |
| <i>Neisseria meningitidis</i>                                     |                                                                                                                                                                    |                 |                      |                 |                                                                                                                                                                                               |                   |                    |                                                                 |                          |                    | 36/36 (100)                                                                                                                                                                                                                                                                                     | 2,171/2,171 (100)  | 1/0                  | 199/0 | 100                                                                                                                                                               | 100             |                                                                  |                 |                                                                                                                              |                                           |                             |                                                                                                                                                        |                 |                                                                       |                |                                                                                                                                                         |                   |  |  |  |  |
| <i>Pseudomonas aeruginosa</i>                                     | 2/2 (100)                                                                                                                                                          | 171/171 (100)   | 2/2 (100)            | 146/171 (85.4)  | 4 (100)                                                                                                                                                                                       |                   |                    |                                                                 | 4 (100)                  |                    | 51/52 (98.1)                                                                                                                                                                                                                                                                                    | 2,154/2,155 (99.9) | 4/0                  | 196/0 | 100                                                                                                                                                               | 100             |                                                                  |                 |                                                                                                                              |                                           |                             |                                                                                                                                                        |                 | 16/16 (100%)                                                          | 176/178 (98.9) | 1,620/1621 (99.9)                                                                                                                                       |                   |  |  |  |  |
| <i>Enterobacteriaceae</i>                                         |                                                                                                                                                                    |                 | 2/2 (100)            | 171/171 (100)   | 23 (100)                                                                                                                                                                                      |                   |                    |                                                                 |                          |                    | 490/498 (98.4)                                                                                                                                                                                                                                                                                  | 1,705/1,709 (99.8) |                      |       |                                                                                                                                                                   |                 |                                                                  |                 |                                                                                                                              |                                           |                             |                                                                                                                                                        |                 |                                                                       |                |                                                                                                                                                         |                   |  |  |  |  |
| <i>Escherichia coli/Shigella</i> species                          | 29/29 (100)                                                                                                                                                        | 144/144 (100)   | 29/29 (100)          | 144/144 (100)   | 11 (100)                                                                                                                                                                                      |                   |                    |                                                                 | 11 (100)                 |                    | 150/153 (98.0)                                                                                                                                                                                                                                                                                  | 2,049/2,054 (99.8) | 39/0                 | 160/1 | 97.5                                                                                                                                                              | 100             |                                                                  |                 |                                                                                                                              |                                           |                             |                                                                                                                                                        |                 | 23/24 (96%)                                                           | 675/675(100)   | 1,118/1124 (99.5)                                                                                                                                       |                   |  |  |  |  |
| <i>Enterobacter</i> species                                       | 4/4 (100)                                                                                                                                                          | 169/169 (100)   | 4/4 (100)            | 169/169 (100)   |                                                                                                                                                                                               |                   |                    |                                                                 | 1 (100)                  |                    |                                                                                                                                                                                                                                                                                                 |                    |                      |       |                                                                                                                                                                   |                 |                                                                  |                 |                                                                                                                              |                                           |                             |                                                                                                                                                        |                 | 13/14 (93%)                                                           | 144/145 (99.3) | 1,918/1924 (99.7)                                                                                                                                       |                   |  |  |  |  |
| <i>Enterobacter cloacae</i> complex                               |                                                                                                                                                                    |                 |                      |                 | 1 (100)                                                                                                                                                                                       |                   |                    |                                                                 |                          |                    | 38/39 (97.4)                                                                                                                                                                                                                                                                                    | 2,165/2,168 (99.9) | 2/0                  | 198/0 | 100                                                                                                                                                               | 100             |                                                                  |                 |                                                                                                                              |                                           |                             |                                                                                                                                                        |                 |                                                                       |                |                                                                                                                                                         |                   |  |  |  |  |
| <i>Citrobacter</i> species                                        | 2/2 (100)                                                                                                                                                          | 170/171 (99.4)  |                      |                 |                                                                                                                                                                                               |                   |                    |                                                                 | 1 (100)                  |                    |                                                                                                                                                                                                                                                                                                 |                    |                      |       |                                                                                                                                                                   |                 |                                                                  |                 |                                                                                                                              |                                           |                             |                                                                                                                                                        |                 | 5/6 (83%)                                                             | 58/58 (100)    | 1,750/1751 (99.9)                                                                                                                                       |                   |  |  |  |  |
| Yeasts                                                            |                                                                                                                                                                    |                 |                      |                 |                                                                                                                                                                                               |                   |                    |                                                                 |                          |                    |                                                                                                                                                                                                                                                                                                 |                    |                      |       |                                                                                                                                                                   |                 |                                                                  |                 |                                                                                                                              |                                           |                             |                                                                                                                                                        |                 |                                                                       |                |                                                                                                                                                         |                   |  |  |  |  |
| <i>Candida albicans</i>                                           |                                                                                                                                                                    |                 |                      |                 |                                                                                                                                                                                               |                   |                    |                                                                 |                          |                    | 64/64 (100)                                                                                                                                                                                                                                                                                     | 2,139/2,143 (99.8) | 7/1                  | 192/0 | 100                                                                                                                                                               | 99.5            |                                                                  |                 |                                                                                                                              |                                           |                             |                                                                                                                                                        |                 |                                                                       |                |                                                                                                                                                         |                   |  |  |  |  |
| <i>Candida glabrata</i>                                           |                                                                                                                                                                    |                 |                      |                 | 27 (100)                                                                                                                                                                                      |                   |                    |                                                                 | 25 (96)                  |                    | 49/49 (100)                                                                                                                                                                                                                                                                                     | 2,156/2,158 (99.9) | 4/0                  | 196/0 | 100                                                                                                                                                               | 100             |                                                                  |                 |                                                                                                                              |                                           |                             |                                                                                                                                                        |                 |                                                                       |                |                                                                                                                                                         |                   |  |  |  |  |
| <i>Candida krusei</i>                                             |                                                                                                                                                                    |                 |                      |                 |                                                                                                                                                                                               |                   |                    |                                                                 |                          |                    | 37/37 (100)                                                                                                                                                                                                                                                                                     | 2,170/2,170 (100)  |                      |       |                                                                                                                                                                   |                 |                                                                  |                 |                                                                                                                              |                                           |                             |                                                                                                                                                        |                 |                                                                       |                |                                                                                                                                                         |                   |  |  |  |  |
| <i>Candida parapsilosis</i>                                       |                                                                                                                                                                    |                 |                      |                 |                                                                                                                                                                                               |                   |                    |                                                                 |                          |                    | 59/61 (96.7)                                                                                                                                                                                                                                                                                    | 2,144/2,146 (99.9) |                      |       |                                                                                                                                                                   |                 |                                                                  |                 |                                                                                                                              |                                           |                             |                                                                                                                                                        |                 |                                                                       |                |                                                                                                                                                         |                   |  |  |  |  |
| <i>Candida tropicalis</i>                                         |                                                                                                                                                                    |                 |                      |                 |                                                                                                                                                                                               |                   |                    |                                                                 |                          |                    | 39/39 (100)                                                                                                                                                                                                                                                                                     | 2,168/2,168 (100)  |                      |       |                                                                                                                                                                   |                 |                                                                  |                 |                                                                                                                              |                                           |                             |                                                                                                                                                        |                 |                                                                       |                |                                                                                                                                                         |                   |  |  |  |  |
| Resistance genes                                                  |                                                                                                                                                                    |                 |                      |                 |                                                                                                                                                                                               |                   |                    |                                                                 |                          |                    |                                                                                                                                                                                                                                                                                                 |                    |                      |       |                                                                                                                                                                   |                 |                                                                  |                 |                                                                                                                              |                                           |                             |                                                                                                                                                        |                 |                                                                       |                |                                                                                                                                                         |                   |  |  |  |  |
| <i>mecA</i>                                                       |                                                                                                                                                                    |                 |                      |                 |                                                                                                                                                                                               |                   |                    |                                                                 |                          |                    |                                                                                                                                                                                                                                                                                                 |                    | 24/2                 | 173/1 | 96                                                                                                                                                                | 98.9            | 44/44                                                            | 100             | 100                                                                                                                          |                                           |                             |                                                                                                                                                        |                 |                                                                       |                |                                                                                                                                                         |                   |  |  |  |  |
| <i>vanA</i>                                                       |                                                                                                                                                                    |                 |                      |                 |                                                                                                                                                                                               |                   |                    |                                                                 |                          |                    |                                                                                                                                                                                                                                                                                                 |                    |                      |       |                                                                                                                                                                   |                 | 23/24                                                            | 95.8            | 100                                                                                                                          |                                           |                             |                                                                                                                                                        |                 |                                                                       |                |                                                                                                                                                         |                   |  |  |  |  |
| <i>vanB</i>                                                       |                                                                                                                                                                    |                 |                      |                 |                                                                                                                                                                                               |                   |                    |                                                                 |                          |                    |                                                                                                                                                                                                                                                                                                 |                    |                      |       |                                                                                                                                                                   |                 |                                                                  |                 |                                                                                                                              |                                           |                             |                                                                                                                                                        |                 |                                                                       |                |                                                                                                                                                         |                   |  |  |  |  |
| <i>bla<sub>KPC</sub></i>                                          |                                                                                                                                                                    |                 |                      |                 | 1 (100)                                                                                                                                                                                       |                   |                    |                                                                 | 1 (100)                  |                    |                                                                                                                                                                                                                                                                                                 |                    |                      |       |                                                                                                                                                                   |                 |                                                                  |                 |                                                                                                                              |                                           |                             |                                                                                                                                                        |                 | 7/7 (100%)                                                            | 53/53 (100)    | 1746/1746 (100)                                                                                                                                         |                   |  |  |  |  |
| <i>bla<sub>NDM</sub></i>                                          |                                                                                                                                                                    |                 |                      |                 |                                                                                                                                                                                               |                   |                    |                                                                 |                          |                    |                                                                                                                                                                                                                                                                                                 |                    |                      |       |                                                                                                                                                                   |                 |                                                                  |                 |                                                                                                                              |                                           |                             |                                                                                                                                                        |                 | 1/1 (100%)                                                            | 51/53 (96.2)   | 1746/1746 (100)                                                                                                                                         |                   |  |  |  |  |
| <i>bla<sub>OXA</sub></i>                                          |                                                                                                                                                                    |                 |                      |                 |                                                                                                                                                                                               |                   |                    |                                                                 |                          |                    |                                                                                                                                                                                                                                                                                                 |                    |                      |       |                                                                                                                                                                   |                 |                                                                  |                 |                                                                                                                              |                                           |                             |                                                                                                                                                        |                 | 1/1 (100%)                                                            | 66/70 (94.3)   | 1728/1729 (99.9)                                                                                                                                        |                   |  |  |  |  |
| <i>bla<sub>VIM</sub></i>                                          |                                                                                                                                                                    |                 |                      |                 |                                                                                                                                                                                               |                   |                    |                                                                 |                          |                    |                                                                                                                                                                                                                                                                                                 |                    |                      |       |                                                                                                                                                                   |                 |                                                                  |                 |                                                                                                                              |                                           |                             |                                                                                                                                                        |                 | 3/3 (100%)                                                            | 68/68 (100)    | 1731/1731 (100)                                                                                                                                         |                   |  |  |  |  |
| <i>bla<sub>IMP</sub></i>                                          |                                                                                                                                                                    |                 |                      |                 |                                                                                                                                                                                               |                   |                    |                                                                 |                          |                    |                                                                                                                                                                                                                                                                                                 |                    |                      |       |                                                                                                                                                                   |                 |                                                                  |                 |                                                                                                                              |                                           |                             |                                                                                                                                                        |                 | 1/2 (50%)                                                             | 47/47 (100)    | 1752/1752 (100)                                                                                                                                         |                   |  |  |  |  |
| <i>bla<sub>CTX-M</sub></i>                                        |                                                                                                                                                                    |                 |                      |                 |                                                                                                                                                                                               |                   |                    | 1(100)                                                          |                          |                    |                                                                                                                                                                                                                                                                                                 |                    |                      |       |                                                                                                                                                                   |                 |                                                                  |                 |                                                                                                                              |                                           |                             |                                                                                                                                                        |                 | 19/19 (100%)                                                          | 181/183 (98.9) | 1616/1616 (100)                                                                                                                                         |                   |  |  |  |  |
| Comparator methods/Gold standard used to assess assay performance | Isolates were identified using Vitek 2 (bioMérieux), MALDI TOF MS and biochemical methods. Susceptibility testing was performed per routine protocol with Vitek 2. |                 |                      |                 | Isolates were identified using Vitek MS RUO (bioMérieux). Susceptibility testing was performed per routine protocol with Vitek 2 using the following cards: AST-GP67, AST-ST01, and AST-GN75. |                   |                    |                                                                 |                          |                    | Isolates were identified using standard phenotypic procedures used in each laboratory and automated methods including MicroScan Walk-Away (Siemens Medical Solutions), Vitek 2, and Phoenix (BD Diagnostics). <i>A. baumannii</i> was identified by bidirectional 16S rRNA gene PCR/sequencing. |                    |                      |       | Isolates were identified using MALDI-TOF MS, Vitek2 XL and by a panel of desktop spot and agglutination tests. Susceptibility testing was done by disc diffusion. |                 |                                                                  |                 | Isolates were identified using PNA-FISH, Vitek 2 and biochemical methods. Susceptibility testing was performed with Vitek 2. |                                           |                             | Isolates were identified using Vitek 2 and other biochemical tests. Discordant results were confirmed by MALDI-TOF MS or 16S rRNA gene PCR/sequencing. |                 |                                                                       |                | Isolates were identified using Vitek 2 and/or Phoenix automated systems. Bidirectional 16S rRNA gene PCR/sequencing was used for discrepant resolution. |                   |  |  |  |  |

TP = True positive, TN = True negative, FP = False positive, FN = False negative, PPA = Positive percent agreement, NPA = Negative percent agreement

**References:**

1. **Ward C, Stocker K, Begum J, Wade P, Ebrahimsa U, Goldenberg SD.** 2015. Performance evaluation of the Verigene (Nanosphere) and FilmArray (BioFire) molecular assays for identification of causative organisms in bacterial bloodstream infections. *European Journal of Clinical Microbiology & Infectious Diseases* **34**:487-496.
2. **Bhatti MM, Boonlayangoor S, Beavis KG, Tesic V.** 2014. Evaluation of FilmArray and Verigene systems for rapid identification of positive blood cultures. *Journal of Clinical Microbiology* **52**:3433-3436.
3. **Salimnia H, Fairfax MR, Lephart PR, Schreckenberger P, DesJarlais SM, Johnson JK, Robinson G, Carroll KC, Greer A, Morgan M, Chan R, Loeffelholz M, Valencia-Shelton F, Jenkins S, Schuetz AN, Daly JA, Barney T, Hemmert A, Kanack KJ.** 2016. Evaluation of the FilmArray blood culture identification panel: results of a multicenter controlled trial. *Journal of Clinical Microbiology* **54**:687-698.
4. **Altun O, Almuhayawi M, Ullberg M, Ozenci V.** 2013. Clinical evaluation of the FilmArray blood culture identification panel in identification of bacteria and yeasts from positive blood culture bottles. *Journal of Clinical Microbiology* **51**:4130-4136.
5. **Wojewoda CM, Sercia L, Navas M, Tuohy M, Wilson D, Hall GS, Procop GW, Richter SS.** 2013. Evaluation of the Verigene Gram-positive blood culture nucleic acid test for rapid detection of bacteria and resistance determinants. *Journal of Clinical Microbiology* **51**:2072-2076.
6. **Mestas J, Polanco CM, Felsenstein S, Dien Bard J.** 2014. Performance of the Verigene Gram-positive blood culture assay for direct detection of Gram-positive organisms and resistance markers in a pediatric hospital. *Journal of Clinical Microbiology* **52**:283-287.
7. **Sullivan KV, Deburger B, Roundtree SS, Ventrola CA, Blecker-Shelly DL, Mortensen JE.** 2014. Pediatric multicenter evaluation of the Verigene gram-negative blood culture test for rapid detection of inpatient bacteremia involving gram-negative organisms, extended-spectrum beta-lactamases, and carbapenemases. *Journal of Clinical Microbiology* **52**:2416-2421.
8. **Ledeboer NA, Lopansri BK, Dhiman N, Cavagnolo R, Carroll KC, Granato P, Thomson R, Jr., Butler-Wu SM, Berger H, Samuel L, Pancholi P, Swyers L, Hansen GT, Tran NK, Polage CR, Thomson KS, Hanson ND, Winegar R, Buchan BW.** 2015. Identification of Gram-negative bacteria and genetic resistance determinants from positive blood culture broths by use of the Verigene Gram-negative blood culture multiplex microarray-based molecular assay. *Journal of Clinical Microbiology* **53**:2460-2472.
