# Supplementary material
Source: PubMed Central journal article supplement (PMC5740973)
Supplement: 31.1.e00024-17_zcm001182612s2.pdf [file 31.1.e00024-17_zcm001182612s2.pdf]

Supplementary Table 2. Major studies evaluating the performance of FDA approved/cleared multiplex respiratory panels

| Study                                                                 | Popowitch et al. (1)                                                                                                                            |                                                   |             |           |                | Rand et al. (2)                                                                                                                                                                                                                                                                                                                                                                                                                             |             |                                   |             |              |          | Pierce et al. (3)                                                                                                                                                                                                         |                                                                                                                                                | Pabbaraju et al. (4)                                                                                                                                                                                                  |                          |                                                          |                                  | Chen et al. (5)                                                                                                                                                                                       |                            |                                                                                                                                                 |                      |                                               | Babady et al. (6)                                                                                                                                                                                                                                                                                                                                              |                                 |                                                      |                              |                                  |                               |                               |                                 |                              |                              |                                           |  |
|-----------------------------------------------------------------------|-------------------------------------------------------------------------------------------------------------------------------------------------|---------------------------------------------------|-------------|-----------|----------------|---------------------------------------------------------------------------------------------------------------------------------------------------------------------------------------------------------------------------------------------------------------------------------------------------------------------------------------------------------------------------------------------------------------------------------------------|-------------|-----------------------------------|-------------|--------------|----------|---------------------------------------------------------------------------------------------------------------------------------------------------------------------------------------------------------------------------|------------------------------------------------------------------------------------------------------------------------------------------------|-----------------------------------------------------------------------------------------------------------------------------------------------------------------------------------------------------------------------|--------------------------|----------------------------------------------------------|----------------------------------|-------------------------------------------------------------------------------------------------------------------------------------------------------------------------------------------------------|----------------------------|-------------------------------------------------------------------------------------------------------------------------------------------------|----------------------|-----------------------------------------------|----------------------------------------------------------------------------------------------------------------------------------------------------------------------------------------------------------------------------------------------------------------------------------------------------------------------------------------------------------------|---------------------------------|------------------------------------------------------|------------------------------|----------------------------------|-------------------------------|-------------------------------|---------------------------------|------------------------------|------------------------------|-------------------------------------------|--|
|                                                                       | Sensitivity                                                                                                                                     |                                                   |             |           |                | Samples in study, n = 200                                                                                                                                                                                                                                                                                                                                                                                                                   |             | Compared to PCR-confirmed results |             |              |          |                                                                                                                                                                                                                           |                                                                                                                                                | Comparison of eSensor XT-8 to laboratory-developed PCRs                                                                                                                                                               |                          | Comparison of xTAG RVP Fast to xTAG RVP as Gold standard |                                  |                                                                                                                                                                                                       |                            | Comparison of Luminex NxTAG RPP to reference standards (BioFire FilmArray Respiratory Panel and laboratory-developed singleplex real-time PCRs) |                      |                                               |                                                                                                                                                                                                                                                                                                                                                                |                                 | Comparison of Luminex xTAG RVP Fast and FilmArray RP |                              |                                  |                               |                               |                                 |                              |                              |                                           |  |
|                                                                       | Number of true positives (n=300 samples tested)                                                                                                 | FilmArray RP                                      | eSensor RVP | x-TAG RVP | x-TAG RVP fast | Number of samples positive                                                                                                                                                                                                                                                                                                                                                                                                                  | Sensitivity |                                   | Specificity |              |          |                                                                                                                                                                                                                           | Positive agreement, samples n=250: samples positive by both RVP and PCR/ (samples positive by both RVP and PCR + samples positive by PCR only) | Negative agreement, samples n=250: samples negative by both RVP and PCR/ (samples negative by both RVP and PCR + samples positive by RVP only)                                                                        | Number of samples tested | Number of co-infected samples                            | Sensitivity of the xTAG RVP fast | Specificity of the xTAG RVP Fast                                                                                                                                                                      | Number of samples positive | Sensitivity of NxTAG                                                                                                                            | Specificity of NxTAG | Agreement between NxTAG and FilmArray (Kappa) | Number of true positives after discordant analysis                                                                                                                                                                                                                                                                                                             | Number detected by DFA/ culture | Sensitivity for DFA/ culture                         | Specificity for DFA/ culture | Number detected by xTAG RVP Fast | Sensitivity for xTAG RVP Fast | Specificity for xTAG RVP Fast | Number detected by FilmArray RP | Sensitivity for FilmArray RP | Specificity for FilmArray RP |                                           |  |
| FilmArray RP                                                          |                                                                                                                                                 |                                                   |             |           |                |                                                                                                                                                                                                                                                                                                                                                                                                                                             | xTAG RVP    | FilmArray RP                      | xTAG RVP    | FilmArray RP | xTAG RVP | NxTAG (n = 284 samples tested)                                                                                                                                                                                            |                                                                                                                                                |                                                                                                                                                                                                                       |                          |                                                          |                                  |                                                                                                                                                                                                       |                            |                                                                                                                                                 |                      |                                               |                                                                                                                                                                                                                                                                                                                                                                |                                 |                                                      |                              |                                  |                               |                               |                                 |                              |                              | reference method (n = 284 samples tested) |  |
| Adenovirus                                                            | 35                                                                                                                                              | 57%                                               | 100%        | 74%       | 83%            | 9                                                                                                                                                                                                                                                                                                                                                                                                                                           | 10          | 90%                               | 100%        | 100%         | 100%     | 28/31 (90%)                                                                                                                                                                                                               | 219/219 (100%)                                                                                                                                 | 29%                                                                                                                                                                                                                   | 12%                      | 96%                                                      | 99.7%                            | 48                                                                                                                                                                                                    | 41                         | 100%                                                                                                                                            | 97%                  | 0.91                                          | 1                                                                                                                                                                                                                                                                                                                                                              | 0                               | 0%                                                   | NA                           | 1                                | 100%                          | 100%                          | 1                               | 100%                         | 100%                         |                                           |  |
| Coronavirus                                                           |                                                                                                                                                 |                                                   |             |           |                |                                                                                                                                                                                                                                                                                                                                                                                                                                             |             |                                   |             |              |          |                                                                                                                                                                                                                           |                                                                                                                                                |                                                                                                                                                                                                                       |                          |                                                          |                                  |                                                                                                                                                                                                       |                            |                                                                                                                                                 |                      |                                               |                                                                                                                                                                                                                                                                                                                                                                |                                 |                                                      |                              |                                  |                               |                               |                                 |                              |                              |                                           |  |
| Coronavirus HKU1                                                      |                                                                                                                                                 |                                                   |             |           |                |                                                                                                                                                                                                                                                                                                                                                                                                                                             |             |                                   |             |              |          |                                                                                                                                                                                                                           |                                                                                                                                                |                                                                                                                                                                                                                       |                          |                                                          |                                  |                                                                                                                                                                                                       |                            |                                                                                                                                                 |                      |                                               |                                                                                                                                                                                                                                                                                                                                                                |                                 |                                                      |                              |                                  |                               |                               |                                 |                              |                              |                                           |  |
| Coronavirus NL63                                                      |                                                                                                                                                 |                                                   |             |           |                |                                                                                                                                                                                                                                                                                                                                                                                                                                             |             |                                   |             |              |          |                                                                                                                                                                                                                           |                                                                                                                                                |                                                                                                                                                                                                                       |                          |                                                          |                                  |                                                                                                                                                                                                       |                            |                                                                                                                                                 |                      |                                               |                                                                                                                                                                                                                                                                                                                                                                |                                 |                                                      |                              |                                  |                               |                               |                                 |                              |                              |                                           |  |
| Coronavirus 229E                                                      |                                                                                                                                                 |                                                   |             |           |                |                                                                                                                                                                                                                                                                                                                                                                                                                                             |             |                                   |             |              |          |                                                                                                                                                                                                                           |                                                                                                                                                |                                                                                                                                                                                                                       |                          |                                                          |                                  |                                                                                                                                                                                                       |                            |                                                                                                                                                 |                      |                                               |                                                                                                                                                                                                                                                                                                                                                                |                                 |                                                      |                              |                                  |                               |                               |                                 |                              |                              |                                           |  |
| Coronavirus OC43                                                      |                                                                                                                                                 |                                                   |             |           |                |                                                                                                                                                                                                                                                                                                                                                                                                                                             |             |                                   |             |              |          |                                                                                                                                                                                                                           |                                                                                                                                                |                                                                                                                                                                                                                       |                          |                                                          |                                  |                                                                                                                                                                                                       |                            |                                                                                                                                                 |                      |                                               |                                                                                                                                                                                                                                                                                                                                                                |                                 |                                                      |                              |                                  |                               |                               |                                 |                              |                              |                                           |  |
| Human bocavirus                                                       |                                                                                                                                                 |                                                   |             |           |                |                                                                                                                                                                                                                                                                                                                                                                                                                                             |             |                                   |             |              |          |                                                                                                                                                                                                                           |                                                                                                                                                |                                                                                                                                                                                                                       |                          |                                                          |                                  |                                                                                                                                                                                                       |                            |                                                                                                                                                 |                      |                                               |                                                                                                                                                                                                                                                                                                                                                                |                                 |                                                      |                              |                                  |                               |                               |                                 |                              |                              |                                           |  |
| Human metapneumovirus                                                 | 26                                                                                                                                              | 96%                                               | 100%        | 100%      | 100%           | 7                                                                                                                                                                                                                                                                                                                                                                                                                                           | 6           | 100%                              | 86%         | 100%         | 100%     | 23/25 (92%)                                                                                                                                                                                                               | 225/225 (100%)                                                                                                                                 | 30                                                                                                                                                                                                                    | 11                       | 93%                                                      | 100%                             | 21                                                                                                                                                                                                    | 10                         | 100%                                                                                                                                            | 96%                  | 0.63                                          | 1                                                                                                                                                                                                                                                                                                                                                              | 0                               | 0                                                    | 0                            | 1                                | 100%                          | 100%                          | 1                               | 100%                         | 100%                         |                                           |  |
| Influenza A                                                           | 30                                                                                                                                              | 86% (one sample tested as equivocal was excluded) | 100%        | 100%      | 87%            | 32                                                                                                                                                                                                                                                                                                                                                                                                                                          | 33          | 97%                               | 100%        | 100%         | 100%     | 70/72 (97%)                                                                                                                                                                                                               | 178/178 (100%)                                                                                                                                 | 63%                                                                                                                                                                                                                   | 6%                       | 97%                                                      | 100%                             | 49                                                                                                                                                                                                    | 49                         | 100%                                                                                                                                            | 100%                 | 1.00                                          | 21                                                                                                                                                                                                                                                                                                                                                             | 17                              | 81%                                                  | 100%                         | 20                               | 95%                           | 99.6%                         | 21                              | 100%                         | 100%                         |                                           |  |
| Subtype H1                                                            |                                                                                                                                                 |                                                   |             |           |                |                                                                                                                                                                                                                                                                                                                                                                                                                                             |             |                                   |             |              |          |                                                                                                                                                                                                                           |                                                                                                                                                |                                                                                                                                                                                                                       |                          |                                                          |                                  |                                                                                                                                                                                                       |                            |                                                                                                                                                 |                      |                                               |                                                                                                                                                                                                                                                                                                                                                                |                                 |                                                      |                              |                                  |                               |                               |                                 |                              |                              |                                           |  |
| Subtype H3                                                            | 14                                                                                                                                              | 100%                                              | 100%        | 93%       | 79%            |                                                                                                                                                                                                                                                                                                                                                                                                                                             |             |                                   |             |              |          |                                                                                                                                                                                                                           |                                                                                                                                                |                                                                                                                                                                                                                       |                          |                                                          |                                  |                                                                                                                                                                                                       |                            |                                                                                                                                                 |                      |                                               |                                                                                                                                                                                                                                                                                                                                                                |                                 |                                                      |                              |                                  |                               |                               |                                 |                              |                              |                                           |  |
| Subtype 2009 H1N1                                                     | 16                                                                                                                                              | 73%                                               | 100%        | 100%      | 81%            |                                                                                                                                                                                                                                                                                                                                                                                                                                             |             |                                   |             |              |          |                                                                                                                                                                                                                           |                                                                                                                                                |                                                                                                                                                                                                                       |                          |                                                          |                                  |                                                                                                                                                                                                       |                            |                                                                                                                                                 |                      |                                               |                                                                                                                                                                                                                                                                                                                                                                |                                 |                                                      |                              |                                  |                               |                               |                                 |                              |                              |                                           |  |
| Influenza B                                                           | 22                                                                                                                                              | 77%                                               | 100%        | 96%       | 46%            | 7                                                                                                                                                                                                                                                                                                                                                                                                                                           | 7           | 100%                              | 100%        | 100%         | 100%     | 22/24 (92%)                                                                                                                                                                                                               | 226/226 (100%)                                                                                                                                 | 46%                                                                                                                                                                                                                   | 2%                       | 41%                                                      | 100%                             | 20                                                                                                                                                                                                    | 20                         | 100%                                                                                                                                            | 100%                 | 1.00                                          | 2                                                                                                                                                                                                                                                                                                                                                              | 2                               | 100%                                                 | 100%                         | 1                                | 50%                           | 100%                          | 2                               | 100%                         | 100%                         |                                           |  |
| Parainfluenza                                                         |                                                                                                                                                 |                                                   |             |           |                |                                                                                                                                                                                                                                                                                                                                                                                                                                             |             |                                   |             |              |          |                                                                                                                                                                                                                           |                                                                                                                                                |                                                                                                                                                                                                                       |                          |                                                          |                                  |                                                                                                                                                                                                       |                            |                                                                                                                                                 |                      |                                               |                                                                                                                                                                                                                                                                                                                                                                |                                 |                                                      |                              |                                  |                               |                               |                                 |                              |                              |                                           |  |
| Parainfluenza 1                                                       | 14                                                                                                                                              | 100%                                              | 100%        | 100%      | NA             |                                                                                                                                                                                                                                                                                                                                                                                                                                             |             |                                   |             |              |          |                                                                                                                                                                                                                           |                                                                                                                                                |                                                                                                                                                                                                                       |                          |                                                          |                                  |                                                                                                                                                                                                       |                            |                                                                                                                                                 |                      |                                               |                                                                                                                                                                                                                                                                                                                                                                |                                 |                                                      |                              |                                  |                               |                               |                                 |                              |                              |                                           |  |
| Parainfluenza 2                                                       | 13                                                                                                                                              | 92%                                               | 100%        | 100%      | NA             |                                                                                                                                                                                                                                                                                                                                                                                                                                             |             |                                   |             |              |          |                                                                                                                                                                                                                           |                                                                                                                                                |                                                                                                                                                                                                                       |                          |                                                          |                                  |                                                                                                                                                                                                       |                            |                                                                                                                                                 |                      |                                               |                                                                                                                                                                                                                                                                                                                                                                |                                 |                                                      |                              |                                  |                               |                               |                                 |                              |                              |                                           |  |
| Parainfluenza 3                                                       | 13                                                                                                                                              | 100%                                              | 100%        | 100%      | NA             |                                                                                                                                                                                                                                                                                                                                                                                                                                             |             |                                   |             |              |          |                                                                                                                                                                                                                           |                                                                                                                                                |                                                                                                                                                                                                                       |                          |                                                          |                                  |                                                                                                                                                                                                       |                            |                                                                                                                                                 |                      |                                               |                                                                                                                                                                                                                                                                                                                                                                |                                 |                                                      |                              |                                  |                               |                               |                                 |                              |                              |                                           |  |
| Parainfluenza 4                                                       |                                                                                                                                                 |                                                   |             |           |                |                                                                                                                                                                                                                                                                                                                                                                                                                                             |             |                                   |             |              |          |                                                                                                                                                                                                                           |                                                                                                                                                |                                                                                                                                                                                                                       |                          |                                                          |                                  |                                                                                                                                                                                                       |                            |                                                                                                                                                 |                      |                                               |                                                                                                                                                                                                                                                                                                                                                                |                                 |                                                      |                              |                                  |                               |                               |                                 |                              |                              |                                           |  |
| Respiratory syncytial virus                                           |                                                                                                                                                 |                                                   |             |           |                | 45                                                                                                                                                                                                                                                                                                                                                                                                                                          | 37          | 100%                              | 82%         | 100%         | 100%     |                                                                                                                                                                                                                           |                                                                                                                                                |                                                                                                                                                                                                                       |                          |                                                          |                                  |                                                                                                                                                                                                       |                            |                                                                                                                                                 |                      |                                               |                                                                                                                                                                                                                                                                                                                                                                |                                 |                                                      |                              |                                  |                               |                               |                                 |                              |                              |                                           |  |
| Respiratory syncytial virus A                                         | 22                                                                                                                                              | 86%                                               | 100%        | 86%       | 86%            |                                                                                                                                                                                                                                                                                                                                                                                                                                             |             |                                   |             |              |          |                                                                                                                                                                                                                           |                                                                                                                                                |                                                                                                                                                                                                                       |                          |                                                          |                                  |                                                                                                                                                                                                       |                            |                                                                                                                                                 |                      |                                               |                                                                                                                                                                                                                                                                                                                                                                |                                 |                                                      |                              |                                  |                               |                               |                                 |                              |                              |                                           |  |
| Respiratory syncytial virus B                                         | 14                                                                                                                                              | 100%                                              | 100%        | 93%       | 86%            |                                                                                                                                                                                                                                                                                                                                                                                                                                             |             |                                   |             |              |          |                                                                                                                                                                                                                           |                                                                                                                                                |                                                                                                                                                                                                                       |                          |                                                          |                                  |                                                                                                                                                                                                       |                            |                                                                                                                                                 |                      |                                               |                                                                                                                                                                                                                                                                                                                                                                |                                 |                                                      |                              |                                  |                               |                               |                                 |                              |                              |                                           |  |
| Rhinovirus/enterovirus                                                | 43                                                                                                                                              | 84%                                               | 91%         | 93%       | 93%            | 43                                                                                                                                                                                                                                                                                                                                                                                                                                          | 41          | 96%                               | 91%         | 100%         | 100%     | 34/35 (97%)                                                                                                                                                                                                               | 206/215 (96%)                                                                                                                                  | 40                                                                                                                                                                                                                    | 30                       | 100%                                                     | 98%                              | 77                                                                                                                                                                                                    | 72                         | 99%                                                                                                                                             | 97%                  | 0.94                                          | 84                                                                                                                                                                                                                                                                                                                                                             | 16                              | 19%                                                  | 100%                         | 87                               | 98%                           | 98%                           | 81                              | 92%                          | 98%                          |                                           |  |
| <i>Chlamydomydia pneumoniae</i>                                       |                                                                                                                                                 |                                                   |             |           |                |                                                                                                                                                                                                                                                                                                                                                                                                                                             |             |                                   |             |              |          |                                                                                                                                                                                                                           |                                                                                                                                                |                                                                                                                                                                                                                       |                          |                                                          |                                  |                                                                                                                                                                                                       |                            |                                                                                                                                                 |                      |                                               |                                                                                                                                                                                                                                                                                                                                                                |                                 |                                                      |                              |                                  |                               |                               |                                 |                              |                              |                                           |  |
| <i>Mycoplasma pneumoniae</i>                                          |                                                                                                                                                 |                                                   |             |           |                |                                                                                                                                                                                                                                                                                                                                                                                                                                             |             |                                   |             |              |          |                                                                                                                                                                                                                           |                                                                                                                                                |                                                                                                                                                                                                                       |                          |                                                          |                                  |                                                                                                                                                                                                       |                            |                                                                                                                                                 |                      |                                               |                                                                                                                                                                                                                                                                                                                                                                |                                 |                                                      |                              |                                  |                               |                               |                                 |                              |                              |                                           |  |
| <i>Bordetella parapertussis</i> /<br><i>Bordetella bronchiseptica</i> |                                                                                                                                                 |                                                   |             |           |                |                                                                                                                                                                                                                                                                                                                                                                                                                                             |             |                                   |             |              |          |                                                                                                                                                                                                                           |                                                                                                                                                |                                                                                                                                                                                                                       |                          |                                                          |                                  |                                                                                                                                                                                                       |                            |                                                                                                                                                 |                      |                                               |                                                                                                                                                                                                                                                                                                                                                                |                                 |                                                      |                              |                                  |                               |                               |                                 |                              |                              |                                           |  |
| <i>Bordetella holmesii</i>                                            |                                                                                                                                                 |                                                   |             |           |                |                                                                                                                                                                                                                                                                                                                                                                                                                                             |             |                                   |             |              |          |                                                                                                                                                                                                                           |                                                                                                                                                |                                                                                                                                                                                                                       |                          |                                                          |                                  |                                                                                                                                                                                                       |                            |                                                                                                                                                 |                      |                                               |                                                                                                                                                                                                                                                                                                                                                                |                                 |                                                      |                              |                                  |                               |                               |                                 |                              |                              |                                           |  |
| Comparison methods                                                    | Laboratory-developed tests (adenovirus, enterovirus, influenza A&B, and RSV A&B), viral culture, xTAG RVPv1, Xpert Flu. (Nasopharyngeal swabs.) |                                                   |             |           |                | Conventional testing performed by viral culture including shell vials or direct antigen testing by the BinaxNow. Sensitivity and specificity were reported after resolving for discrepant results using PCR with TaqMan probes or sequencing. (Nasopharyngeal swabs, n = 101; bronchoalveolar lavage fluid, n = 45; throat, n = 25; miscellaneous, n = 15; endotracheal aspirates, n = 11; bronchial brushings, n = 2; autopsy lung n = 1.) |             |                                   |             |              |          | Laboratory-developed PCRs used as the comparator method. [Archived (frozen) pediatric samples: nasopharyngeal aspirates, n = 239; nasopharyngeal swabs, n = 4; tracheal aspirates, n = 5; bronchoalveolar lavage, n = 2.] |                                                                                                                                                | xTAG RVP used as the comparator method. (Nasopharyngeal swabs, n = 243; nasal swabs, n = 13; throat swabs, n = 36; bronchoalveolar lavage, n = 18; sputum, n = 7; fluid/swabs of unknown respiratory origin, n = 17.) |                          |                                                          |                                  | BioFire FilmArray Respiratory Panel and laboratory-developed singleplex real-time PCRs for human bocavirus used as the Gold standard methods. (Fresh nasopharyngeal swabs in viral transport medium.) |                            |                                                                                                                                                 |                      |                                               | True positives were defined as a sample being positive by at least two methods. Discordant results were resolved using DFA/culture, review of medical records, or were tested by the Resplex II assay. (Nasopharyngeal swabs, n = 280; bronchial washings and lavages, n = 8; throat swabs, n=13; sputum, n = 2; nasopharyngeal known positive swabs, n = 55.) |                                 |                                                      |                              |                                  |                               |                               |                                 |                              |                              |                                           |  |

NA = Not applicable

References:

1. Popowitch EB, O'Neill SS, Miller MB. 2013. Comparison of the Biofire FilmArray RP, Genmark eSensor RVP, Luminex xTAG RVPv1, and Luminex xTAG RVP fast multiplex assays for detection of respiratory viruses. *J Clin Microbiol* **51**:1528-1533.
2. Rand KH, Rampersaud H, Houck HJ. 2011. Comparison of two multiplex methods for detection of respiratory viruses: FilmArray RP and xTAG RVP. *J Clin Microbiol* **49**:2449-2453.
3. Pierce VM, Hodinka RL. 2012. Comparison of the GenMark Diagnostics eSensor respiratory viral panel to real-time PCR for detection of respiratory viruses in children. *J Clin Microbiol* **50**:3458-3465.
4. Pabbaraju K, Wong S, Tokaryk KL, Fonseca K, Drews SJ. 2011. Comparison of the Luminex xTAG respiratory viral panel with xTAG respiratory viral panel fast for diagnosis of respiratory virus infections. *J Clin Microbiol* **49**:1738-1744.
5. Chen JH, Lam HY, Yip CC, Wong SC, Chan JF, Ma ES, Cheng VC, Tang BS, Yuen KY. 2016. Clinical evaluation of the new high-throughput Luminex NxTAG respiratory pathogen panel assay for multiplex respiratory pathogen detection. *J Clin Microbiol* **54**:1820-1825.
6. Babady NE, Mead P, Stiles J, Brennan C, Li H, Shuptar S, Stratton CW, Tang YW, Kamboj M. 2012. Comparison of the Luminex xTAG RVP Fast assay and the Idaho Technology FilmArray RP assay for detection of respiratory viruses in pediatric patients at a cancer hospital. *J Clin Microbiol* **50**:2282-2288.
