# Supplementary material
Source: PubMed Central journal article supplement (PMC5740973)
Supplement: 31.1.e00024-17_zcm001182612s3.pdf [file 31.1.e00024-17_zcm001182612s3.pdf]

Supplementary Table 3. Major studies evaluating the performance of FDA approved/cleared multiplex gastrointestinal panels

| Study                                                    | Huang et al. (1)                                                                                                                                                              |          |             |             | Buss et al. (2)                                                                                                                                     |                     | Khare et al. (3)                                                                                                                                                                                                                                                                                                                                                                                                                                                                                                                                                                                                                                                                                                                                                                                                                                                                                                                                                                                                                                                                                                                                                                              |             |             |             |                                              |             |             |             | Wessels et al. (4)                                                                                                                                                                                                            |             | Spina et al. (5)                                                                                                                                                                                                                            |                     | Patel et al. (6)                                                                                                                                                                                                                                                                                                                                                                                                                                                                                                               |                     |
|----------------------------------------------------------|-------------------------------------------------------------------------------------------------------------------------------------------------------------------------------|----------|-------------|-------------|-----------------------------------------------------------------------------------------------------------------------------------------------------|---------------------|-----------------------------------------------------------------------------------------------------------------------------------------------------------------------------------------------------------------------------------------------------------------------------------------------------------------------------------------------------------------------------------------------------------------------------------------------------------------------------------------------------------------------------------------------------------------------------------------------------------------------------------------------------------------------------------------------------------------------------------------------------------------------------------------------------------------------------------------------------------------------------------------------------------------------------------------------------------------------------------------------------------------------------------------------------------------------------------------------------------------------------------------------------------------------------------------------|-------------|-------------|-------------|----------------------------------------------|-------------|-------------|-------------|-------------------------------------------------------------------------------------------------------------------------------------------------------------------------------------------------------------------------------|-------------|---------------------------------------------------------------------------------------------------------------------------------------------------------------------------------------------------------------------------------------------|---------------------|--------------------------------------------------------------------------------------------------------------------------------------------------------------------------------------------------------------------------------------------------------------------------------------------------------------------------------------------------------------------------------------------------------------------------------------------------------------------------------------------------------------------------------|---------------------|
|                                                          | %Sensitivity/ %Specificity                                                                                                                                                    |          |             |             | Sensitivity                                                                                                                                         | Specificity         | Prospective Study (samples tested n = 230)                                                                                                                                                                                                                                                                                                                                                                                                                                                                                                                                                                                                                                                                                                                                                                                                                                                                                                                                                                                                                                                                                                                                                    |             |             |             | Retrospective Study (samples tested n = 230) |             |             |             | Number of samples positive (samples tested n = 393)                                                                                                                                                                           |             | Number of pathogens detected                                                                                                                                                                                                                |                     | 211 samples tested                                                                                                                                                                                                                                                                                                                                                                                                                                                                                                             |                     |
|                                                          | Number of positives (samples tested, n = 152)                                                                                                                                 | Verigene | Biofire GIP | Luminex GPP |                                                                                                                                                     |                     | Sensitivity                                                                                                                                                                                                                                                                                                                                                                                                                                                                                                                                                                                                                                                                                                                                                                                                                                                                                                                                                                                                                                                                                                                                                                                   | Specificity | Sensitivity | Specificity | Sensitivity                                  | Specificity | Sensitivity | Specificity | Sensitivity                                                                                                                                                                                                                   | Specificity | Luminex xTAG-GPP                                                                                                                                                                                                                            | Routine diagnostics | BioFire GIP                                                                                                                                                                                                                                                                                                                                                                                                                                                                                                                    | Routine diagnostics |
| Biofire GIP                                              |                                                                                                                                                                               |          |             |             | Luminex                                                                                                                                             |                     |                                                                                                                                                                                                                                                                                                                                                                                                                                                                                                                                                                                                                                                                                                                                                                                                                                                                                                                                                                                                                                                                                                                                                                                               |             |             |             |                                              |             |             |             |                                                                                                                                                                                                                               |             |                                                                                                                                                                                                                                             |                     |                                                                                                                                                                                                                                                                                                                                                                                                                                                                                                                                |                     |
| <i>Campylobacter species</i>                             | 12                                                                                                                                                                            | 83/99    | 100/100     | 92/100      | 34/35 (97.1%)                                                                                                                                       | 1,497/1,521 (98.4%) | 100%                                                                                                                                                                                                                                                                                                                                                                                                                                                                                                                                                                                                                                                                                                                                                                                                                                                                                                                                                                                                                                                                                                                                                                                          | 100%        | 100%        | 100%        | 96.6%                                        | 99.6%       | 79.3%       | 100%        | 15                                                                                                                                                                                                                            | 12          | 53                                                                                                                                                                                                                                          | 83                  | 1                                                                                                                                                                                                                                                                                                                                                                                                                                                                                                                              | 1                   |
| <i>Salmonella species</i>                                | 24                                                                                                                                                                            | 83/100   | 96/100      | 79/100      | 31/31 (100%)                                                                                                                                        | 1,519/1,525 (99.6%) | 100%                                                                                                                                                                                                                                                                                                                                                                                                                                                                                                                                                                                                                                                                                                                                                                                                                                                                                                                                                                                                                                                                                                                                                                                          | 99.6%       | 100%        | 100%        | 100%                                         | 100%        | 83.3%       | 100%        | 4                                                                                                                                                                                                                             | 0           | 27                                                                                                                                                                                                                                          | 20                  | 22                                                                                                                                                                                                                                                                                                                                                                                                                                                                                                                             | 19                  |
| <i>Shigella species/EIEC</i>                             | 43                                                                                                                                                                            | 95/99    | 100/100     | 100/100     | 47/49 (95.9%)                                                                                                                                       | 1,505/1,507 (99.9%) | 100%                                                                                                                                                                                                                                                                                                                                                                                                                                                                                                                                                                                                                                                                                                                                                                                                                                                                                                                                                                                                                                                                                                                                                                                          | 100%        | 100%        | 99.6%       | 90.6%                                        | 99.6%       | 81.8%       | ND          | 3                                                                                                                                                                                                                             | 2           | 10                                                                                                                                                                                                                                          | 0                   | 10                                                                                                                                                                                                                                                                                                                                                                                                                                                                                                                             | 7                   |
| <i>Vibrio species</i>                                    | NA                                                                                                                                                                            |          |             |             | 0/0                                                                                                                                                 | 1,554/1,556 (99.9%) | NA                                                                                                                                                                                                                                                                                                                                                                                                                                                                                                                                                                                                                                                                                                                                                                                                                                                                                                                                                                                                                                                                                                                                                                                            | NA          | NA          | NA          | ND                                           | ND          | NA          | NA          |                                                                                                                                                                                                                               |             | 0                                                                                                                                                                                                                                           | 1                   |                                                                                                                                                                                                                                                                                                                                                                                                                                                                                                                                |                     |
| <i>Yersinia enterocolitica</i>                           | NA                                                                                                                                                                            |          |             |             | 1/1                                                                                                                                                 | 1,555/1,555 (100%)  | ND                                                                                                                                                                                                                                                                                                                                                                                                                                                                                                                                                                                                                                                                                                                                                                                                                                                                                                                                                                                                                                                                                                                                                                                            | 100%        | ND          | 100%        | 100%                                         | 99.6%       | 48.1%       | 100%        | 13                                                                                                                                                                                                                            | 13          | 19                                                                                                                                                                                                                                          | 0                   |                                                                                                                                                                                                                                                                                                                                                                                                                                                                                                                                |                     |
| <i>Escherichia coli</i> 0157                             | NA                                                                                                                                                                            |          |             |             | 3/3 (100%)                                                                                                                                          | 34/35 (97.1%)       | ND                                                                                                                                                                                                                                                                                                                                                                                                                                                                                                                                                                                                                                                                                                                                                                                                                                                                                                                                                                                                                                                                                                                                                                                            | 100%        | ND          | 100%        | 100%                                         | 100%        | 90.9%       | 99.6%       | 1                                                                                                                                                                                                                             | ND          |                                                                                                                                                                                                                                             |                     |                                                                                                                                                                                                                                                                                                                                                                                                                                                                                                                                |                     |
| Enterotoxigenic <i>E. coli</i>                           | NA                                                                                                                                                                            |          |             |             | 22/22 (100%)                                                                                                                                        | 1,525/1,534 (99.4%) | 100%                                                                                                                                                                                                                                                                                                                                                                                                                                                                                                                                                                                                                                                                                                                                                                                                                                                                                                                                                                                                                                                                                                                                                                                          | 100%        | 100%        | 100%        | ND                                           | ND          | ND          | ND          |                                                                                                                                                                                                                               |             | 30                                                                                                                                                                                                                                          | 1                   |                                                                                                                                                                                                                                                                                                                                                                                                                                                                                                                                |                     |
| Enteropathogenic <i>E. coli</i>                          | NA                                                                                                                                                                            |          |             |             | 314/317 (99.1%)                                                                                                                                     | 1,167/1,201 (97.2%) | ND                                                                                                                                                                                                                                                                                                                                                                                                                                                                                                                                                                                                                                                                                                                                                                                                                                                                                                                                                                                                                                                                                                                                                                                            | ND          | NA          | NA          | ND                                           | ND          | NA          | NA          |                                                                                                                                                                                                                               |             | 107                                                                                                                                                                                                                                         | 3                   |                                                                                                                                                                                                                                                                                                                                                                                                                                                                                                                                |                     |
| Enterogastric <i>E. coli</i>                             | NA                                                                                                                                                                            |          |             |             | 82/83 (98.8%)                                                                                                                                       | 1,446/1,473 (98.2%) | ND                                                                                                                                                                                                                                                                                                                                                                                                                                                                                                                                                                                                                                                                                                                                                                                                                                                                                                                                                                                                                                                                                                                                                                                            | ND          | NA          | NA          | ND                                           | ND          | NA          | NA          |                                                                                                                                                                                                                               |             | 47                                                                                                                                                                                                                                          | 0                   |                                                                                                                                                                                                                                                                                                                                                                                                                                                                                                                                |                     |
| <i>Plesiomonas shigelloides</i>                          | NA                                                                                                                                                                            |          |             |             | 3/3 (100%)                                                                                                                                          | 1,538/1,553 (99%)   | ND                                                                                                                                                                                                                                                                                                                                                                                                                                                                                                                                                                                                                                                                                                                                                                                                                                                                                                                                                                                                                                                                                                                                                                                            | 100%        | NA          | NA          | 100%                                         | 100%        | NA          | NA          |                                                                                                                                                                                                                               |             | 1                                                                                                                                                                                                                                           | 0                   |                                                                                                                                                                                                                                                                                                                                                                                                                                                                                                                                |                     |
| <i>stx1/stx2</i> (Shiga toxin-producing <i>E. coli</i> ) | 12                                                                                                                                                                            | 92/100   | 100/100     | 92/100      | 33/33 (100%)                                                                                                                                        | 1,518/1,523 (99.7%) | ND                                                                                                                                                                                                                                                                                                                                                                                                                                                                                                                                                                                                                                                                                                                                                                                                                                                                                                                                                                                                                                                                                                                                                                                            | 99.6%       | ND          | 100%        | 100%                                         | 99.2%       | 96.4%       | 99.6%       | 4                                                                                                                                                                                                                             | 4           | 19                                                                                                                                                                                                                                          | 3                   | 3                                                                                                                                                                                                                                                                                                                                                                                                                                                                                                                              | 3                   |
| <i>Clostridium difficile</i> (toxin A/B)                 | NA                                                                                                                                                                            |          |             |             | 163/165 (98.8%)                                                                                                                                     | 1,350/1,391 (97.1%) | 100%                                                                                                                                                                                                                                                                                                                                                                                                                                                                                                                                                                                                                                                                                                                                                                                                                                                                                                                                                                                                                                                                                                                                                                                          | 96.6%       | 95.8%       | 97.2%       | 91.7%                                        | 97.9%       | 91.7%       | 98.3%       | 1                                                                                                                                                                                                                             | 1           | 65                                                                                                                                                                                                                                          | 17                  | 23                                                                                                                                                                                                                                                                                                                                                                                                                                                                                                                             | 23                  |
| Norovirus GI/GII                                         | 19                                                                                                                                                                            | 89/100   | 95/99       | 90/100      | 52/55 (94.5%)                                                                                                                                       | 1,483/1,501 (98.8%) | 91.7%                                                                                                                                                                                                                                                                                                                                                                                                                                                                                                                                                                                                                                                                                                                                                                                                                                                                                                                                                                                                                                                                                                                                                                                         | 99.5%       | 100%        | 90.8%       | 93.2%                                        | 100%        | 93.2%       | 85.8%       | 20                                                                                                                                                                                                                            | 22          | 42                                                                                                                                                                                                                                          | 10                  | 11                                                                                                                                                                                                                                                                                                                                                                                                                                                                                                                             | 11                  |
| Rotavirus A                                              | 7                                                                                                                                                                             | 71/100   | 100/99      | 100/100     | 6/6 (100%)                                                                                                                                          | 1,538/1,550 (99.2%) | ND                                                                                                                                                                                                                                                                                                                                                                                                                                                                                                                                                                                                                                                                                                                                                                                                                                                                                                                                                                                                                                                                                                                                                                                            | 99.6%       | ND          | 99.1%       | 100%                                         | 99.6%       | 92.9%       | 99.6%       | 1                                                                                                                                                                                                                             | 1           | 27                                                                                                                                                                                                                                          | 14                  | 2                                                                                                                                                                                                                                                                                                                                                                                                                                                                                                                              | 2                   |
| Astrovirus                                               | NA                                                                                                                                                                            |          |             |             | 7/7 (100%)                                                                                                                                          | 1,548/1,549 (99.9%) | 100%                                                                                                                                                                                                                                                                                                                                                                                                                                                                                                                                                                                                                                                                                                                                                                                                                                                                                                                                                                                                                                                                                                                                                                                          | ND          | NA          | NA          | 100%                                         | 100%        | NA          | NA          |                                                                                                                                                                                                                               |             | 12                                                                                                                                                                                                                                          | 0                   |                                                                                                                                                                                                                                                                                                                                                                                                                                                                                                                                |                     |
| Adenovirus 40/41                                         | NA                                                                                                                                                                            |          |             |             | 42/44 (95.5%)                                                                                                                                       | 1,499/1,512 (99.1%) | 100%                                                                                                                                                                                                                                                                                                                                                                                                                                                                                                                                                                                                                                                                                                                                                                                                                                                                                                                                                                                                                                                                                                                                                                                          | 99.6%       | 100%        | 100%        | 90.0%                                        | 99.2%       | 80%         | 100%        | 3                                                                                                                                                                                                                             | 3           | 17                                                                                                                                                                                                                                          | 4                   |                                                                                                                                                                                                                                                                                                                                                                                                                                                                                                                                |                     |
| Sapovirus                                                |                                                                                                                                                                               |          |             |             | 46/46 (100%)                                                                                                                                        | 1,497/1,510 (99.1%) | 100%                                                                                                                                                                                                                                                                                                                                                                                                                                                                                                                                                                                                                                                                                                                                                                                                                                                                                                                                                                                                                                                                                                                                                                                          | ND          | NA          | NA          | 90.3%                                        | 100%        | NA          | NA          |                                                                                                                                                                                                                               |             | 18                                                                                                                                                                                                                                          | 0                   |                                                                                                                                                                                                                                                                                                                                                                                                                                                                                                                                |                     |
| <i>Cryptosporidium species</i>                           | NA                                                                                                                                                                            |          |             |             | 18/18 (100%)                                                                                                                                        | 1,532/1,538 (99.6%) | 100%                                                                                                                                                                                                                                                                                                                                                                                                                                                                                                                                                                                                                                                                                                                                                                                                                                                                                                                                                                                                                                                                                                                                                                                          | 100%        | 100%        | 100%        | 100%                                         | 100%        | 100%        | 100%        | 3                                                                                                                                                                                                                             | 3           | 13                                                                                                                                                                                                                                          | 4                   | 11                                                                                                                                                                                                                                                                                                                                                                                                                                                                                                                             | 14                  |
| <i>Entamoeba histolytica</i>                             | NA                                                                                                                                                                            |          |             |             | 0/0                                                                                                                                                 | 1,556/1,556 (100%)  | ND                                                                                                                                                                                                                                                                                                                                                                                                                                                                                                                                                                                                                                                                                                                                                                                                                                                                                                                                                                                                                                                                                                                                                                                            | 100%        | ND          | 100%        | 0%                                           | 100%        | 100%        | 100%        | 6                                                                                                                                                                                                                             | 1           |                                                                                                                                                                                                                                             |                     |                                                                                                                                                                                                                                                                                                                                                                                                                                                                                                                                |                     |
| <i>Giardia lamblia</i>                                   | NA                                                                                                                                                                            |          |             |             | 20/20 (100%)                                                                                                                                        | 1,529/1,536 (99.5%) | 100%                                                                                                                                                                                                                                                                                                                                                                                                                                                                                                                                                                                                                                                                                                                                                                                                                                                                                                                                                                                                                                                                                                                                                                                          | 100%        | 100%        | 100%        | 100%                                         | 100%        | 100%        | 100%        | 9                                                                                                                                                                                                                             | 9           | 17                                                                                                                                                                                                                                          | 3                   | 3                                                                                                                                                                                                                                                                                                                                                                                                                                                                                                                              | 3                   |
| <i>Cyclospora cayatanensis</i>                           | NA                                                                                                                                                                            |          |             |             | 19/19 (100%)                                                                                                                                        | 1,537/1,537 (100%)  | ND                                                                                                                                                                                                                                                                                                                                                                                                                                                                                                                                                                                                                                                                                                                                                                                                                                                                                                                                                                                                                                                                                                                                                                                            | 100%        | NA          | NA          | ND                                           | ND          | NA          | NA          |                                                                                                                                                                                                                               |             | 1                                                                                                                                                                                                                                           | 0                   |                                                                                                                                                                                                                                                                                                                                                                                                                                                                                                                                |                     |
| Comparison methods                                       | Culture: <i>Salmonella</i> , <i>Shigella</i> , and <i>Campylobacter</i> species; ImmunoCard STAT!EHEC: Shiga toxin; SURE-VUE Rota Test: rotavirus; Xpert norovirus: Norovirus |          |             |             | Compared to conventional methods of culture, PCR, or PCR plus sequencing, not including additional positives detected by GIP or discrepant analysis |                     | Prospectively collected stool was stored in Cary-Blair at 4°C and tested within 5 days of collection. Retrospective specimens were previously characterized and stored at either 4°C or -20°C. The reference method for <i>Salmonella</i> , <i>Shigella</i> , <i>Campylobacter</i> , <i>Yersinia</i> , <i>Aeromonas</i> , and <i>Vibrio</i> species and <i>Plesiomonas shigelloides</i> detection was culture. Real-time PCR was used for adenovirus, Shiga toxin ( <i>stx1/stx2</i> ), <i>Yersinia enterocolitica</i> , and <i>Salmonella</i> , <i>Campylobacter</i> , and <i>Shigella</i> species. <i>C. difficile</i> (toxin A/B) was detected with a laboratory-developed real-time PCR assay. Viral targets (aside from adenovirus) were detected using viral culture. Ova and parasite microscopic examination (concentrated wet preparations and permanent stains) was used to detect parasites. <i>Cyclospora</i> samples received a modified safranin stain. <i>Giardia</i> and <i>Cryptosporidium</i> species were also detected with the ProSpecT antigen enzyme. For some discordant results, samples were sent to the Minnesota Department of Health for real-time PCR analysis. |             |             |             |                                              |             |             |             | Routine testing for bacteria and bacterial toxins was performed by culture and VIDAS (BioMérieux), while viruses and parasites were identified using multiplex real-time PCRs, with additional discrepant analysis performed. |             | Samples were collected from 10 laboratories in 10 European countries and tested using their own routine testing. Each laboratory sent an aliquoted of stool in Cary-Blair medium to a central study lab to be tested using the BioFire GIP. |                     | This was a prospective study. The gold standard reference methods were: <i>Campylobacter</i> , <i>Salmonella</i> , and <i>Shigella</i> species - culture; Shiga toxin - Meridian premier EHEC EIA kit; <i>Clostridium difficile</i> - Cepheid Xpert C. <i>difficile</i> and MicroSEQ (16S rRNA gene sequencing); <i>E. coli</i> and <i>E. coli</i> O157:H7 - cultures and MicroSEQ; Norovirus GI/GII and Rotavirus A - CDC real-time PCR; <i>Cryptosporidium</i> and <i>Giardia</i> species - Meridian EIA Crypto/Giardia EIA. |                     |

NA = Not applicable, ND = Not done, LDT = Laboratory developed test

**References:**

- Huang RS, Johnson CL, Pritchard L, Hepler R, Ton TT, Dunn JJ. 2016. Performance of the Verigene(R) enteric pathogens test, Biofire FilmArray gastrointestinal panel and Luminex xTAG(R) gastrointestinal pathogen panel for detection of common enteric pathogens. *Diagn Microbiol Infect Dis* **86**:336-339.
- Buss SN, Leber A, Chapin K, Fey PD, Bankowski MJ, Jones MK, Rogatcheva M, Kanack KJ, Bourzac KM. 2015. Multicenter evaluation of the BioFire FilmArray gastrointestinal panel for etiologic diagnosis of infectious gastroenteritis. *J Clin Microbiol* **53**:915-925.
- Khare R, Espy MJ, Cebelinski E, Boxrud D, Sloan LM, Cunningham SA, Pritt BS, Patel R, Binnicker MJ. 2014. Comparative evaluation of two commercial multiplex panels for detection of gastrointestinal pathogens by use of clinical stool specimens. *J Clin Microbiol* **52**:3667-3673.
- Wessels E, Rusman LG, van Bussel MJ, Claas EC. 2014. Added value of multiplex Luminex Gastrointestinal Pathogen Panel (xTAG(R) GPP) testing in the diagnosis of infectious gastroenteritis. *Clin Microbiol Infect* **20**:O182-187.
- Spina A, Kerr KG, Cormican M, Barbut F, Eigentler A, Zerva L, Tassios P, Popescu GA, Rafila A, Eerola E, Batista J, Maass M, Aschbacher R, Olsen KE, Allerberger F. 2015. Spectrum of enteropathogens detected by the FilmArray GI Panel in a multicentre study of community-acquired gastroenteritis. *Clin Microbiol Infect* **21**:719-728.
- Patel A, Navidad J, Bhattacharyya S. 2014. Site-specific clinical evaluation of the Luminex xTAG gastrointestinal pathogen panel for detection of infectious gastroenteritis in fecal specimens. *J Clin Microbiol* **52**:3068-3071.
